# Supplementary material for: Mobile Media as an “Essential” Tool for Collective Action: Explaining Intentions for Disruptive Political Behavior in U.S. Politics
Source: MDPI journal article supplement (doi:10.3390/journalmedia4010018), 2023-02-05
Supplement: s1 [file s1]

## **Supplementary Materials**

### **Supplementary information**

#### **S1**

Because Alt-Right participants are highly skeptical and often mistrust academics, all individuals read a prompt before answering survey questions. The prompt was adapted from Forscher and Kteily (2020) and read as follows, “There are a lot of misunderstandings about people’s media use and their political attitudes. We want to address this issue. We’ll be asking various questions about your political beliefs and your experiences with media. As you answer these questions, remember that all your responses are confidential. We’ll never reveal who you are. In order for us to understand your views accurately, it’s important that you answer these questions honestly.” Participants then proceeded to answer the survey questions.

## Tables

**Table S1.** Linear model predicting offline collective action intentions.

|                                        | Offline Collective Action |
|----------------------------------------|---------------------------|
| Sex                                    | -0.18 (0.12)              |
| Income                                 | 0.05 (0.04)               |
| Education                              | -0.05 (0.05)              |
| Mobile phone entertainment             | -0.18* (0.08)             |
| Mobile phone news                      | 0.02 (0.07)               |
| Mobile phone events                    | -0.04 (0.07)              |
| Mobile phone social interaction        | -0.04 (0.08)              |
| Mobile phone collective action essence | 0.67*** (0.06)            |
| Constant                               | 2.42*** (0.41)            |

Note: \* $p < 0.05$ , \*\*  $p < 0.01$ ; \*\*\*  $p < 0.01$ .

**Table S2.** Linear model predicting collective action intentions on social media.

|                                        | Online Collective Action |
|----------------------------------------|--------------------------|
| Sex                                    | -0.33** (0.12)           |
| Income                                 | 0.03 (0.04)              |
| Education                              | -0.10* (0.05)            |
| Mobile phone entertainment             | -0.16* (0.08)            |
| Mobile phone news                      | 0.06 (0.07)              |
| Mobile phone events                    | 0.04 (0.07)              |
| Mobile phone social interaction        | 0.00 (0.08)              |
| Mobile phone collective action essence | 0.44*** (0.06)           |
| Constant                               | 3.36*** (0.40)           |

Note: \* $p < 0.05$ , \*\*  $p < 0.01$ ; \*\*\*  $p < 0.01$ .

**Table S3.** Linear model predicting non-normative collective action.

|                                        | Non-Normative Collective Action |
|----------------------------------------|---------------------------------|
| Sex                                    | -0.47*** (0.10)                 |
| Income                                 | -0.04 (0.04)                    |
| Education                              | 0.08 (0.04)                     |
| Mobile phone entertainment             | -0.20** (0.07)                  |
| Mobile phone news                      | 0.10 (0.06)                     |
| Mobile phone events                    | 0.04 (0.06)                     |
| Mobile phone social interaction        | -0.19** (0.07)                  |
| Mobile phone collective action essence | 0.63*** (0.05)                  |
| Constant                               | 1.66*** (0.35)                  |

Note: \* $p < 0.05$ , \*\*  $p < 0.01$ ; \*\*\*  $p < 0.01$ .
